# Supplementary material for: A metal-free decarboxylative cyclization from natural α-amino acids to construct pyridine derivatives
Source: Royal Society of Chemistry journal article supplement (doi:10.1039/c0gc00753f), 2011-01-01

## A metal-free decarboxylative cyclization from natural $\alpha$ -amino acids to construct pyridine derivatives

Qiang Wang, Changfeng Wan, Yang Gu, Jintang Zhang, Lingfeng Gao, and Zhiyong Wang\*

Hefei National Laboratory for Physical Sciences at Microscale, CAS Key Laboratory of Soft Matter Chemistry and Department of Chemistry, University of Science and Technology of China, Hefei, Anhui, 230026, P. R. China  
E-mail: zwang3@ustc.edu.cn, Fax: (+86) 551-360-3185, Tel: (+86) 551-360-3185

| Table of contents                                                                        | page |
|------------------------------------------------------------------------------------------|------|
| General                                                                                  | 1    |
| Typical Procedure for the decarboxylative cyclization between Ala and phenylacetaldehyde | 1    |
| Analytical and spectral data for the compounds                                           | 2-6  |
| Reference                                                                                | 6    |
| $^1\text{H}$ NMR and $^{13}\text{C}$ NMR spectrogram                                     | 6-19 |

### General

All reagents used in this reaction were prepared free of water.

$^1\text{H}$  NMR (300 MHz) and  $^{13}\text{C}$  NMR (75 MHz) were registered on 300 M spectrometers with  $\text{CDCl}_3$  as solvent and tetramethylsilane (TMS) as internal standard. Chemical shifts were reported in units (ppm) by assigning TMS resonance in the  $^1\text{H}$  spectrum as 0.00 ppm and  $\text{CDCl}_3$  resonance in the  $^{13}\text{C}$  spectrum as 77.16 ppm. All coupling constants (J values) were reported in Hertz (Hz). Column chromatography was performed on silica gel 200-300 mesh.

### Typical Procedure for the decarboxylative cyclization between Ala and phenylacetaldehyde

$\text{I}_2$  (0.1 mmol) was dissolved in 2 mL DMA, powder 4Å MS (200 mg), L-Ala (0.32 mmol) phenylacetaldehyde (0.4 mmol), TBHP (0.4 mmol) were added. The system was stirred under nitrogen, temperature was slowly raised from room temperature to 70 °C in 20 minutes, and kept this temperature for 1.5 h. Reaction was monitored by TLC. Cooled to room temperature, the system was extracted by ethyl acetate (3 × 40 ml), then the organic layer were washed with brine

(2 × 20 mL), dried with anhydrous Na<sub>2</sub>SO<sub>4</sub>. The solvent was removed and purified by flash column chromatography (petroleum ether : ethyl acetate = 10 : 1) to give yellow oil.

**Analytical and spectral data for the compounds.**

**2-methyl-3,5-diphenylpyridine(C1):**

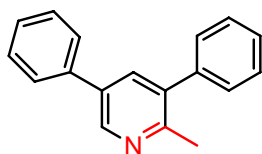

Purified by column chromatography (petroleum ether : ethyl acetate = 10 : 1) to give light yellow oil, <sup>1</sup>H NMR (CDCl<sub>3</sub>, 300 MHz) δ 8.74 (d, *J* = 1.8 Hz, 1H), 7.74 (d, *J* = 1.8 Hz, 1H), 7.61 (m, 2H), 7.48-7.36 (m, 8H), 2.86 (s, 3H). <sup>13</sup>C NMR (CDCl<sub>3</sub>, 75 MHz) δ 154.66, 146.14, 139.84, 137.64, 136.95, 135.76, 134.15, 129.09, 128.53, 127.96, 127.66, 127.04, 23.05. HRMS calcd 245.1204, Found 245.1208. IR (cm<sup>-1</sup>) ν 3058, 3030, 2924, 1433, 762, 699.

**3,5-diphenylpyridine(C2)**

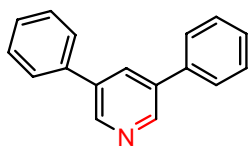

Purified by column chromatography (petroleum ether : ethyl acetate = 12 : 1) to give light yellow solid, melting point: 135-136 °C, (lit<sup>1</sup>. mp 137-138 °C). <sup>1</sup>H NMR (CDCl<sub>3</sub>, 300 MHz) δ 8.82 (s, 2H), 8.07 (s, 1H), 7.66-7.63 (m, 4H), 7.53-7.36 (m, 6H). <sup>13</sup>C NMR (CDCl<sub>3</sub>, 75 MHz) δ 146.96, 137.75, 136.68, 132.97, 129.17, 128.29, 127.30. HRMS calcd 231.1048, Found 231.1053. IR (cm<sup>-1</sup>) ν 3073, 3037, 2915, 1435, 762, 699.

**2,3,5-triphenylpyridine(C3)<sup>2</sup>**

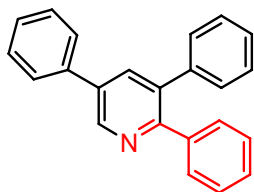

Purified by column chromatography (petroleum ether : ethyl acetate = 15 : 1) to give light yellow solid, melting point: 119-121 °C. <sup>1</sup>H NMR (CDCl<sub>3</sub>, 300 MHz) δ 8.93 (d, *J* = 2.1 Hz, 1H), 7.93 (d, *J* = 2.1 Hz, 1H), 7.69-7.66 (m, 2H), 7.53-7.38 (m, 5H), 7.32-7.23 (m, 8H). <sup>13</sup>C NMR (CDCl<sub>3</sub>, 75 MHz) δ 155.91, 146.72, 139.92, 139.87, 137.43, 136.99, 136.00, 135.04,

129.96, 129.64, 129.20, 128.46, 128.23, 127.98, 127.90, 127.41, 127.18. **HRMS calcd** 307.1361, **Found** 307.1363. **IR (cm<sup>-1</sup>)**  $\nu$  3083, 3057, 2925, 1428, 760, 697.

#### 2-isopropyl-3,5-diphenylpyridine (C4)

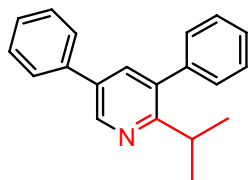

Purified by column chromatography (petroleum ether : ethyl acetate = 10 : 1) to give light yellow oil, **<sup>1</sup>H NMR (CDCl<sub>3</sub>, 300 MHz)**  $\delta$  8.85 (d,  $J$  = 2.4Hz, 2H), 7.69 (d,  $J$  = 2.4Hz, 1H), 7.62-7.59 (m, 2H), 7.48-7.33 (m, 8H), 3.26 (m, 1H), 1.27-1.25 (d, 6H). **<sup>13</sup>C NMR (CDCl<sub>3</sub>, 75 MHz)**  $\delta$  163.07, 146.79, 140.04, 137.78, 135.94, 133.55, 129.17, 129.08, 128.44, 127.88, 127.52, 127.05, 31.27, 22.70. **HRMS calcd** 273.1517, **Found** 273.1516. **IR (cm<sup>-1</sup>)**  $\nu$  2961, 1431, 1396, 759, 697.

#### 3,5-diphenyl-2-propylpyridine(C5)

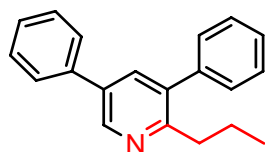

Purified by column chromatography (petroleum ether : ethyl acetate = 10 : 1) to give light yellow oil, **<sup>1</sup>H NMR (CDCl<sub>3</sub>, 300 MHz)**  $\delta$  8.80 (d,  $J$  = 2.4Hz, 1H), 7.74 (d,  $J$  = 2.4Hz, 1H), 7.62-7.59 (m, 2H), 7.49-7.34 (m, 8H), 2.82-2.77 (m, 2H), 1.78-1.65 (m, 2H), 0.90-0.85 (m, 3H). **<sup>13</sup>C NMR (CDCl<sub>3</sub>, 75 MHz)**  $\delta$  158.42, 146.37, 139.96, 137.69, 136.92, 135.91, 133.76, 129.15, 128.43, 128.17, 127.91, 127.54, 127.03, 37.14, 23.09, 14.12. **HRMS calcd** 273.1517, **Found** 273.1519. **IR (cm<sup>-1</sup>)**  $\nu$  3029, 2961, 1453, 1432, 761, 699.

#### 2-sec-butyl-3,5-diphenylpyridine(C6)

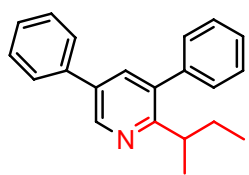

Purified by column chromatography (petroleum ether : ethyl acetate = 10 : 1) to give light yellow oil, **<sup>1</sup>H NMR (CDCl<sub>3</sub>, 300 MHz)**  $\delta$  8.64 (d,  $J$  = 2.4Hz, 1H), 7.69 (d,  $J$  = 2.4Hz, 1H), 7.62-7.59 (m, 2H), 7.48-7.31 (m, 8H), 3.01 (m, 1H), 1.89 (m, 1H), 1.63 (m, 1H), 1.26 (d,  $J$  =

6.9, 3H), 0.74 (m, 3H).  $^{13}\text{C}$  NMR ( $\text{CDCl}_3$ , 75 MHz)  $\delta$  162.36, 146.90, 140.16, 137.79, 136.92, 135.67, 133.28, 129.29, 129.07, 128.39, 127.86, 127.44, 127.04, 38.26, 29.89, 21.00, 12.36. HRMS calcd 287.1674, Found 287.1678. IR ( $\text{cm}^{-1}$ )  $\nu$  2963, 2907, 1448, 1431, 1261, 1030, 864, 800, 700.

#### 2-isobutyl-3,5-diphenylpyridine(C7)

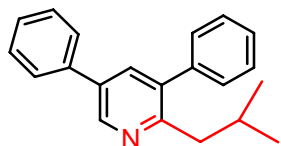

Purified by column chromatography (petroleum ether : ethyl acetate = 10 : 1) to give light yellow oil,  $^1\text{H}$  NMR ( $\text{CDCl}_3$ , 300 MHz)  $\delta$  8.81 (d,  $J$  = 1.8Hz, 1H), 7.71 (d,  $J$  = 1.8Hz, 1H), 7.62-7.60 (m, 2H), 7.48-7.25 (m, 8H), 7.73 (d,  $J$  = 7.2Hz, 2H), 2.13 (m, 1H), 0.81 (d,  $J$  = 6.6Hz, 6H).  $^{13}\text{C}$  NMR ( $\text{CDCl}_3$ , 75 MHz)  $\delta$  157.86, 146.36, 140.09, 137.68, 137.38, 135.81, 133.57, 129.35, 129.08, 128.38, 127.91, 127.46, 127.03, 43.72, 29.03, 22.51. HRMS calcd 287.1674, Found 287.1679. IR ( $\text{cm}^{-1}$ )  $\nu$  3030, 2955, 2867, 1452, 760, 698.

#### 2-butyl-3,5-diphenylpyridine (C8)

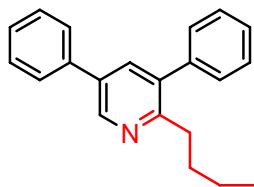

Purified by column chromatography (petroleum ether : ethyl acetate = 10 : 1) to give light yellow oil,  $^1\text{H}$  NMR ( $\text{CDCl}_3$ , 300 MHz)  $\delta$  8.79 (d,  $J$  = 2.4Hz, 1H), 7.71 (d,  $J$  = 2.4Hz, 1H), 7.61-7.59 (d,  $J$  = 7.8Hz, 2H), 7.48-7.34 (m, 8H), 2.83 (m, 2H), 1.71 (m, 2H), 1.34 (m, 2H), 0.85 (m, 3H).  $^{13}\text{C}$  NMR ( $\text{CDCl}_3$ , 75 MHz)  $\delta$  158.69, 146.47, 139.99, 137.75, 136.81, 135.83, 133.70, 129.15, 129.05, 128.40, 127.87, 127.52, 127.03, 34.91, 32.03, 22.69, 13.88. HRMS calcd 287.1674, Found 287.1680. IR ( $\text{cm}^{-1}$ )  $\nu$  3030, 2957, 2929, 2859, 1453, 1432, 761, 699.

#### 2-benzyl-3,5-diphenylpyridine(C9)

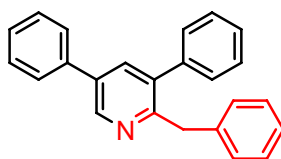

Purified by column chromatography (petroleum ether : ethyl acetate =

10 : 1) to give light yellow oil,  $^1\text{H NMR}$  ( $\text{CDCl}_3$ , 300 MHz)  $\delta$  8.83 (d,  $J = 2.4\text{Hz}$ , 1H), 7.75 (d,  $J = 2.4\text{Hz}$ , 1H), 7.62-7.61 (d,  $J = 1.2\text{Hz}$ , 2H), 7.59 (d,  $J = 2.4\text{Hz}$ , 2H), 7.46-7.13 (m, 12H), 7.05 (d,  $J = 6.9\text{Hz}$ , 2H), 4.19 (s, 2H).  $^{13}\text{C NMR}$  ( $\text{CDCl}_3$ , 75 MHz)  $\delta$  156.70, 146.76, 140.06, 139.63, 137.56, 137.48, 136.30, 134.37, 129.33, 129.16, 128.91, 128.51, 128.35, 128.10, 127.79, 127.14, 126.08, 41.33. **HRMS calcd** 321.1517, **Found** 321.1513. **IR** ( $\text{cm}^{-1}$ )  $\nu$  3059, 3028, 2926, 1451, 1433, 761, 698.

**methyl 3-(3,5-diphenylpyridin-2-yl)propanoate (C10)**

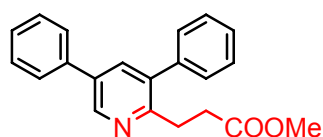

Purified by column chromatography (petroleum ether : ethyl acetate = 10 : 1) to give light yellow oil,  $^1\text{H NMR}$  ( $\text{CDCl}_3$ , 300 MHz)  $\delta$  8.77 (d,  $J = 2.4\text{Hz}$ , 1H), 7.72 (d,  $J = 2.4\text{Hz}$ , 1H), 7.61 (d,  $J = 1.2\text{Hz}$ , 2H), 7.49-7.36 (m, 8H), 3.64 (s, 3H), 3.15 (m, 2H), 2.83 (m, 2H).  $^{13}\text{C NMR}$  ( $\text{CDCl}_3$ , 75 MHz)  $\delta$  173.78, 155.86, 146.33, 139.43, 137.60, 136.96, 135.81, 134.17, 129.79, 129.11, 129.07, 128.58, 127.97, 127.74, 127.05, 51.56, 32.59, 29.86. **HRMS calcd** 317.1416, **Found** 317.1410 **IR** ( $\text{cm}^{-1}$ )  $\nu$  3029, 2949, 1737, 1434, 1172, 762, 699.

**2-phenyl-3,5-dip-tolylpyridine (C11)**

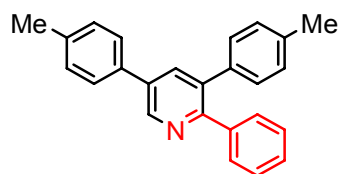

Purified by column chromatography (petroleum ether : ethyl acetate = 15 : 1) to give light yellow oil,  $^1\text{H NMR}$  ( $\text{CDCl}_3$ , 300 MHz)  $\delta$  8.80 (d,  $J = 2.4\text{Hz}$ , 1H), 7.78 (d,  $J = 2.4\text{Hz}$ , 1H), 7.47 (s, 1H), 7.44 (s, 1H), 7.33-7.28 (m, 2H), 7.20-7.12 (m, 5H), 7.04-6.97 (m, 4H), 2.30 (s, 3H), 2.23 (s, 3H).  $^{13}\text{C NMR}$  ( $\text{CDCl}_3$ , 75 MHz)  $\delta$  155.55, 146.31, 140.03, 138.15, 137.14, 136.99, 136.81, 135.96, 134.99, 134.56, 129.93, 129.51, 129.18, 127.97, 127.79, 127.00, 21.25. **HRMS calcd** 335.1674, **Found** 335.1680. **IR** ( $\text{cm}^{-1}$ )  $\nu$  3130, 2865, 2217, 1906, 1514, 821.

**3,5-bis(4-chlorophenyl)-2-phenylpyridine (C12)**

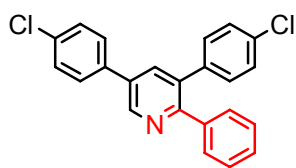

Purified by column chromatography (petroleum ether : ethyl acetate = 15 : 1) to give light yellow solid, melting point: 197-198.5 °C.  $^1\text{H NMR}$  ( $\text{CDCl}_3$ , 300 MHz)  $\delta$  8.90 (d,  $J = 2.4\text{Hz}$ , 1H), 7.85 (d,  $J = 2.4\text{Hz}$ , 1H), 7.61 (d,  $J = 8.7\text{Hz}$ , 2H), 7.49 (d,  $J = 8.4\text{Hz}$ , 2H), 7.39-7.36 (m, 2H), 7.29-7.25 (m, 5H), 7.17 (d,  $J = 8.4\text{Hz}$ , 2H).  $^{13}\text{C NMR}$  ( $\text{CDCl}_3$ , 75 MHz)  $\delta$  156.23, 146.78, 139.39, 138.21, 136.65, 135.71, 134.93, 134.64, 134.04, 133.75, 130.93, 129.93, 129.49, 128.80, 128.43, 128.23. HRMS calcd 375.0582, Found 375.0589. IR ( $\text{cm}^{-1}$ )  $\nu$  3030, 1490, 1446, 1089, 824.

#### 2-phenyl-3,5-di(thiophen-3-yl)pyridine(C13)

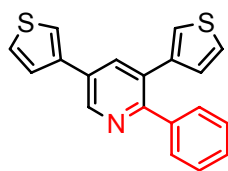

Purified by column chromatography (petroleum ether : ethyl acetate = 12 : 1) to give light yellow solid, melting point: 137-139 °C.  $^1\text{H NMR}$  ( $\text{CDCl}_3$ , 300 MHz)  $\delta$  8.83 (d,  $J = 2.1\text{Hz}$ , 1H), 7.87 (d,  $J = 2.1\text{Hz}$ , 1H), 7.52-7.50 (m, 1H), 7.38-7.33 (m, 4H), 7.23-7.21 (m, 3H), 7.17-7.09 (m, 2H), 6.72-6.71 (m, 1H).  $^{13}\text{C NMR}$  ( $\text{CDCl}_3$ , 75 MHz)  $\delta$  155.66, 146.00, 140.16, 139.91, 138.37, 135.80, 131.07, 130.19, 129.59, 128.75, 128.17, 127.16, 126.04, 125.69, 123.84, 121.70, HRMS calcd 319.0489, Found 319.0496. IR ( $\text{cm}^{-1}$ )  $\nu$  3102, 2960, 2926, 1446, 1427, 1018, 778, 698, 640.

#### Reference:

1. T.-H. Chuang, Y.-C. Chen and S. Pola, *J. Org. Chem.*, 2010, **75**, 6625.
2. J. L. Papparín, Crevisy, R. Greand and L. Toupet, *J. Heterocyclic chem.*, 2000, **37**, 411.

#### $^1\text{H NMR}$ and $^{13}\text{C NMR}$ spectrogram

**2-methyl-3,5-diphenylpyridine(C1)**

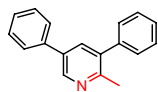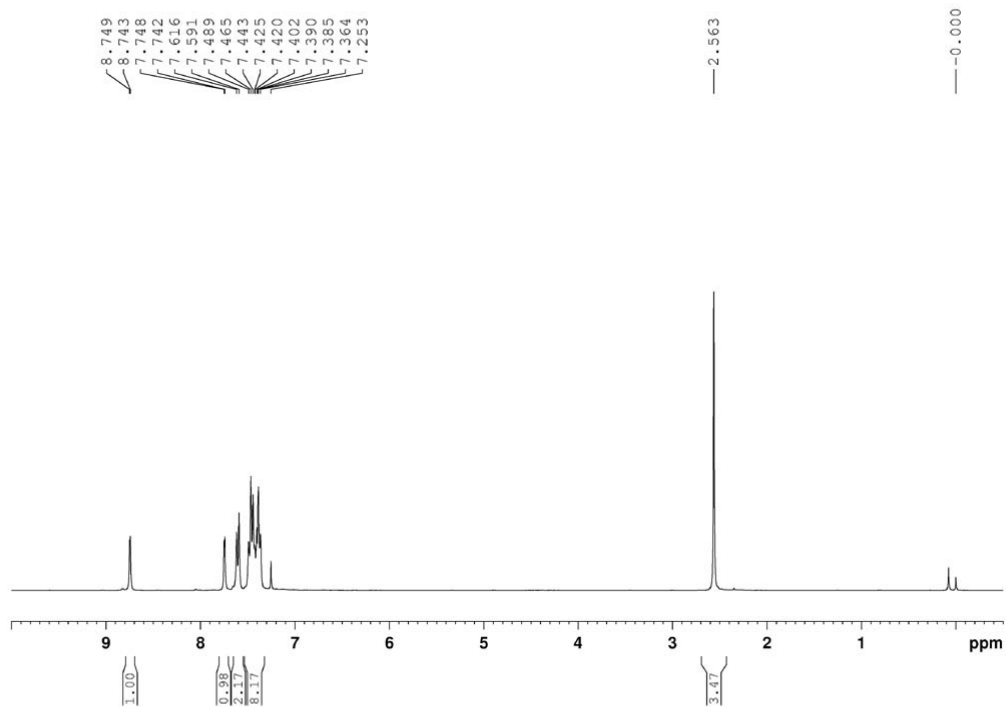

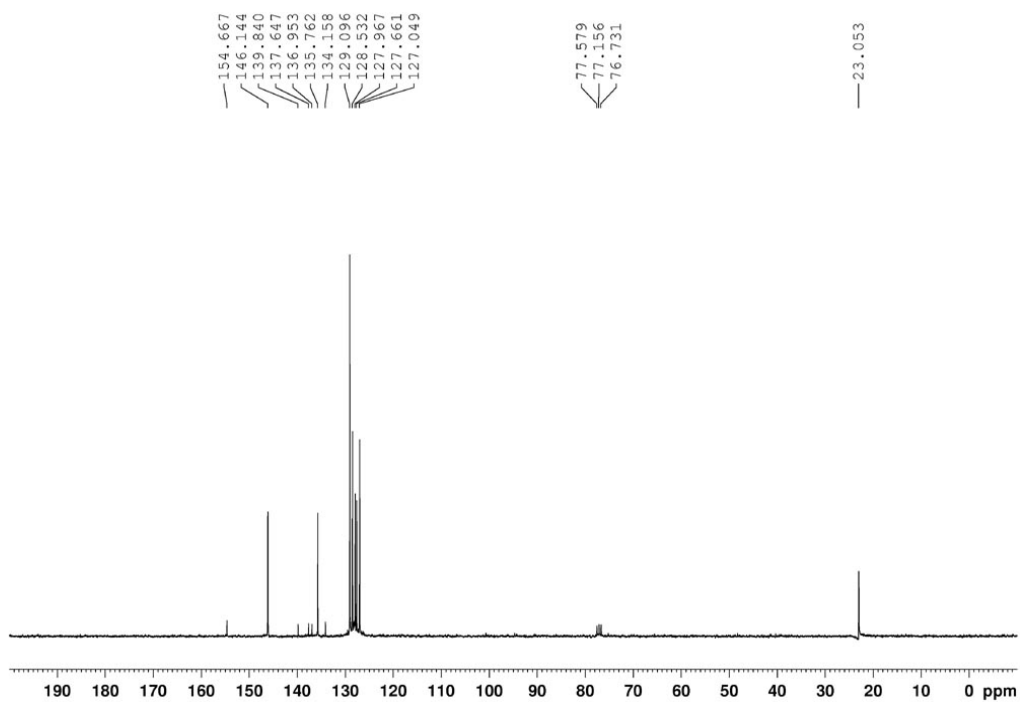

**3,5-diphenylpyridine(C2)**

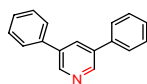



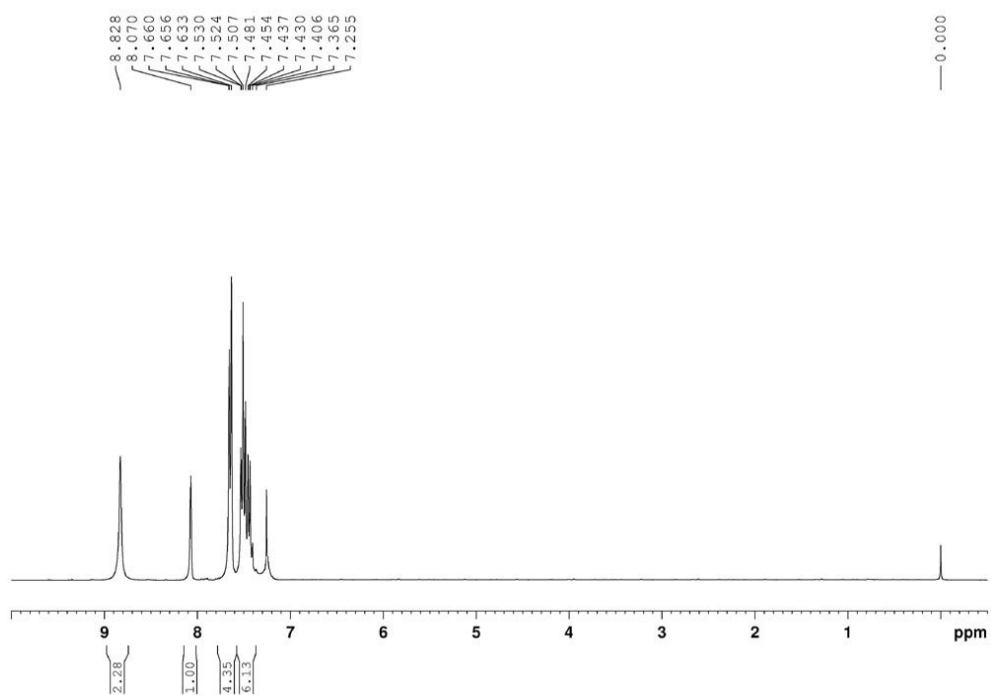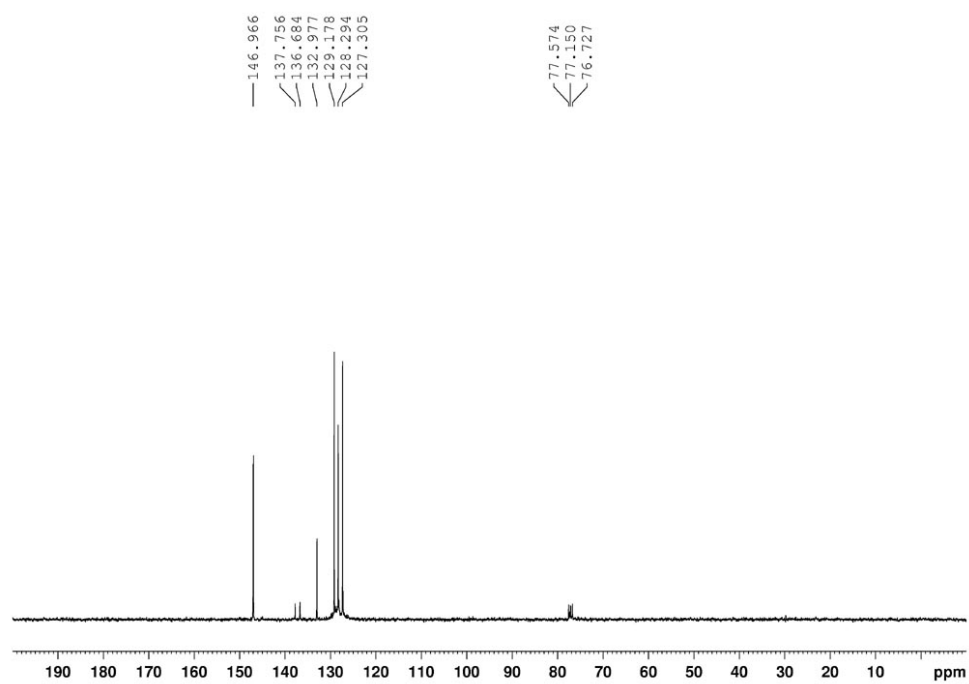

### 2,3,5-triphenylpyridine(C3)

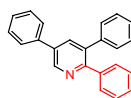

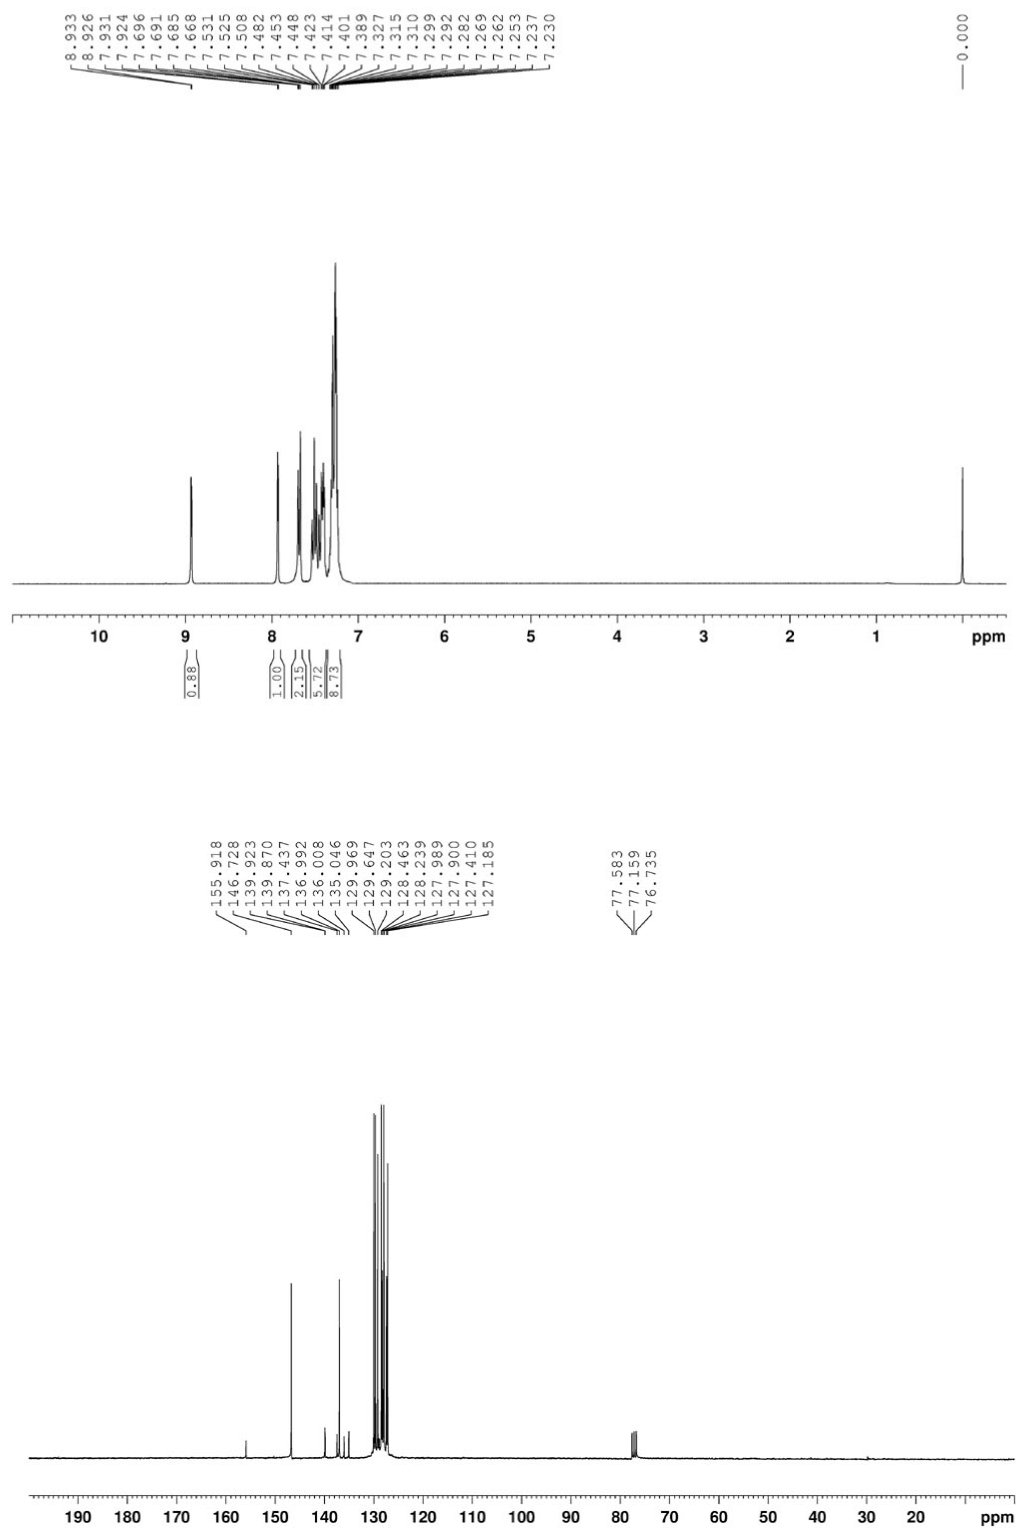

2-isopropyl-3,5-diphenylpyridine(C4)

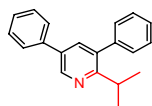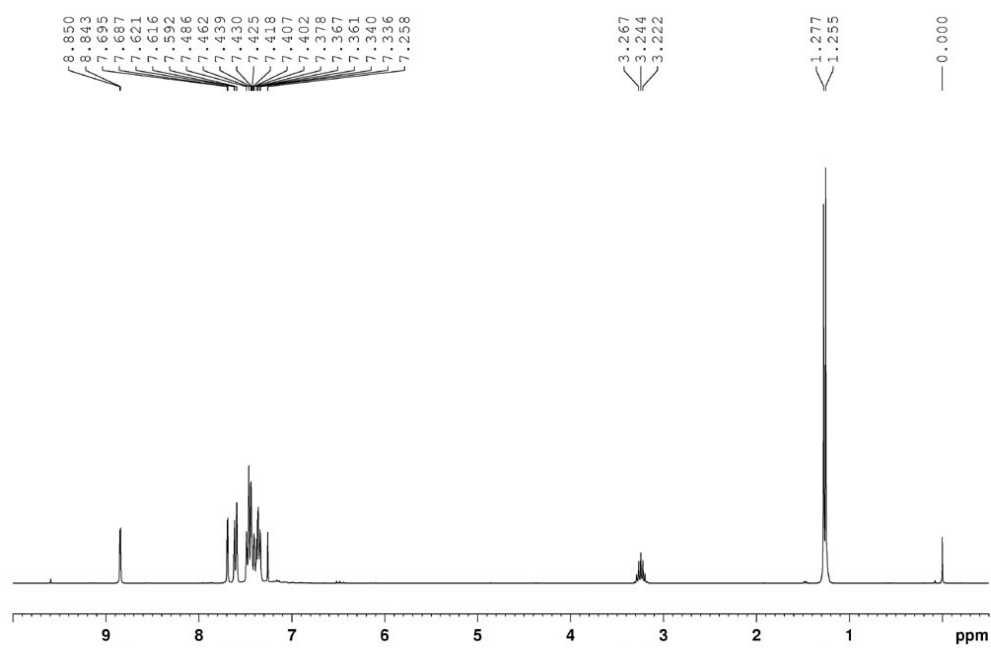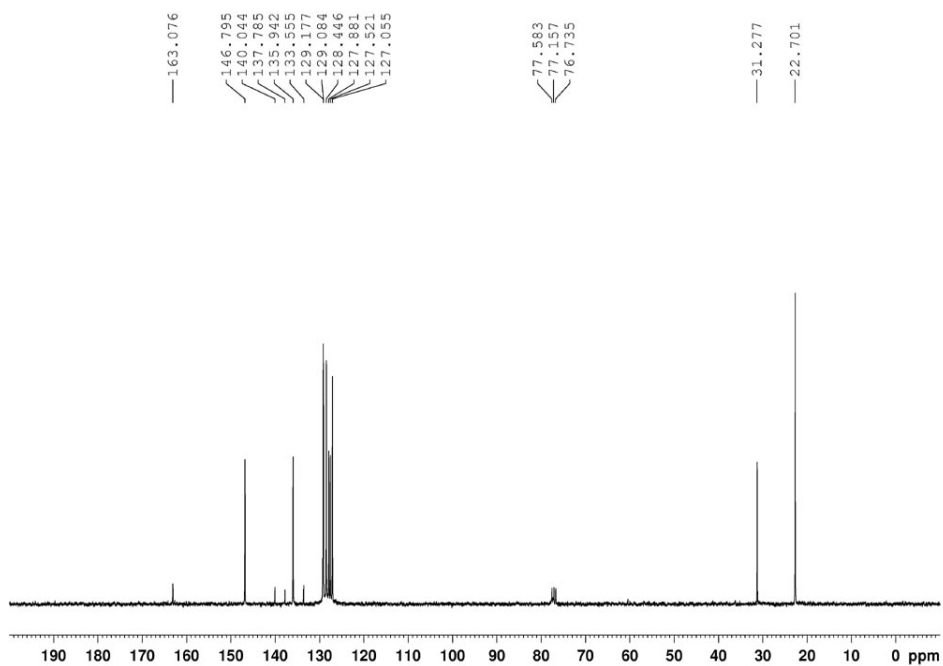

### 3,5-diphenyl-2-propylpyridine(C5)

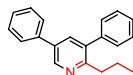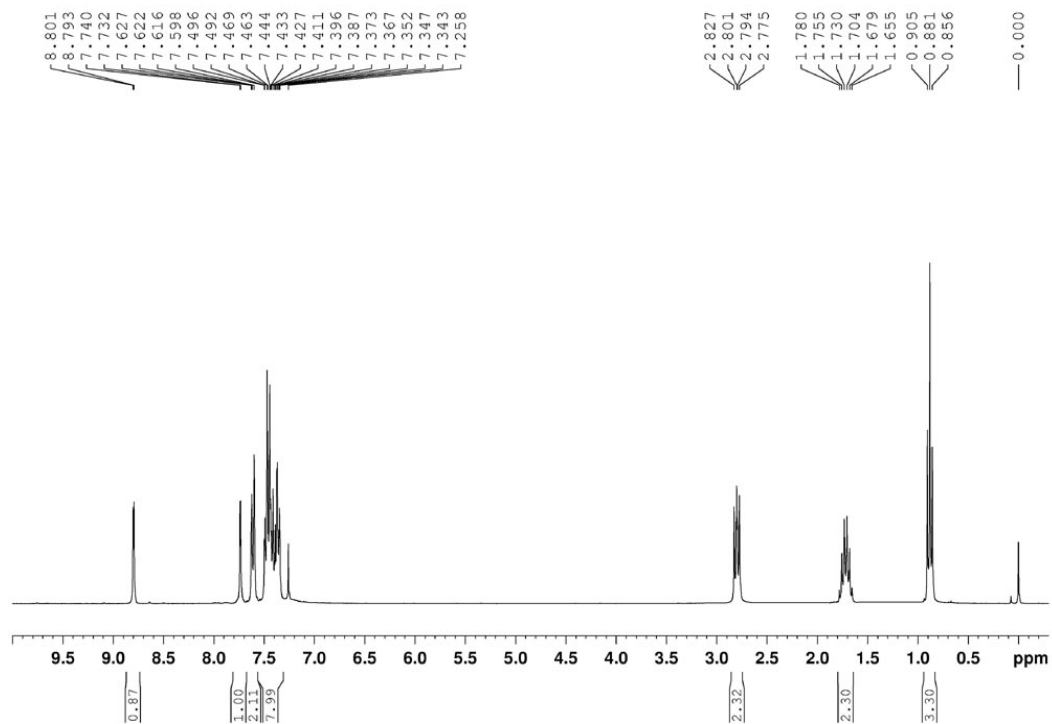

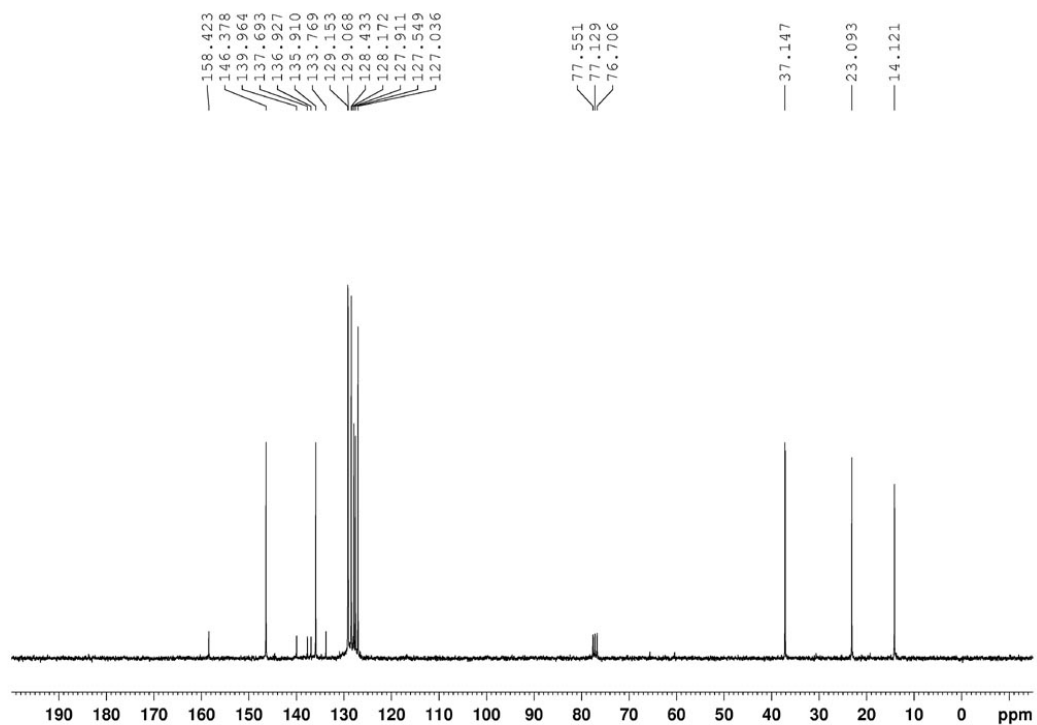

**2-sec-butyl-3,5-diphenylpyridine (C6)**

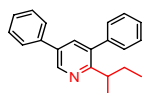

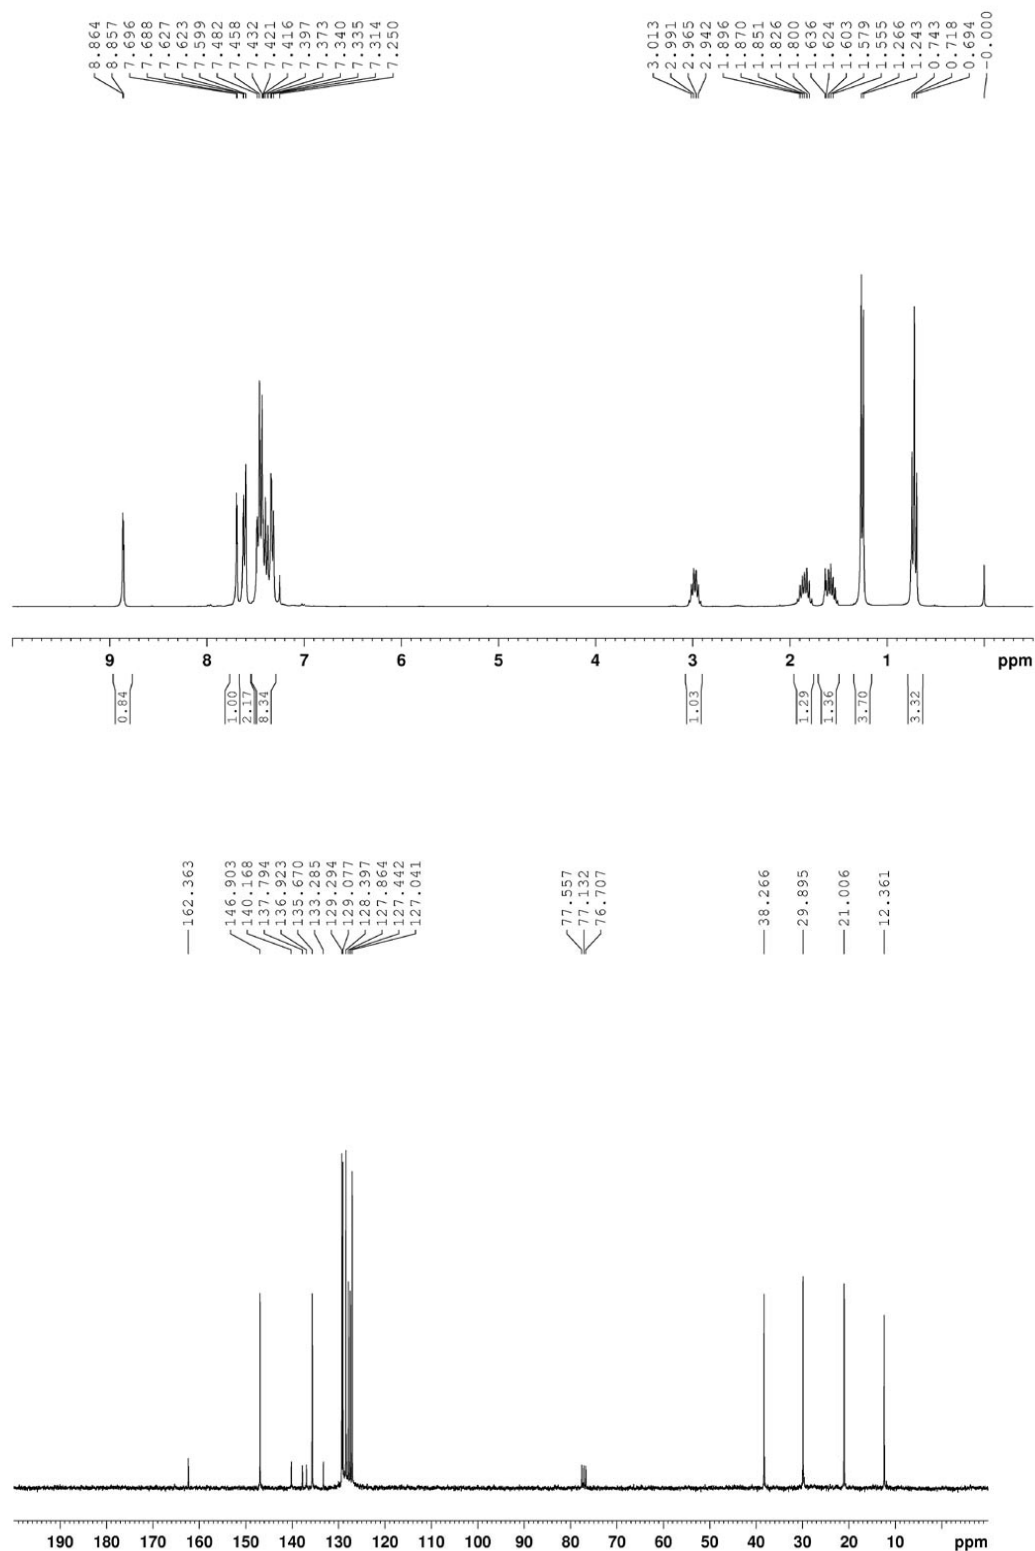

2-isobutyl-3,5-diphenylpyridine (C7)

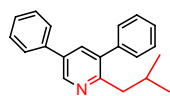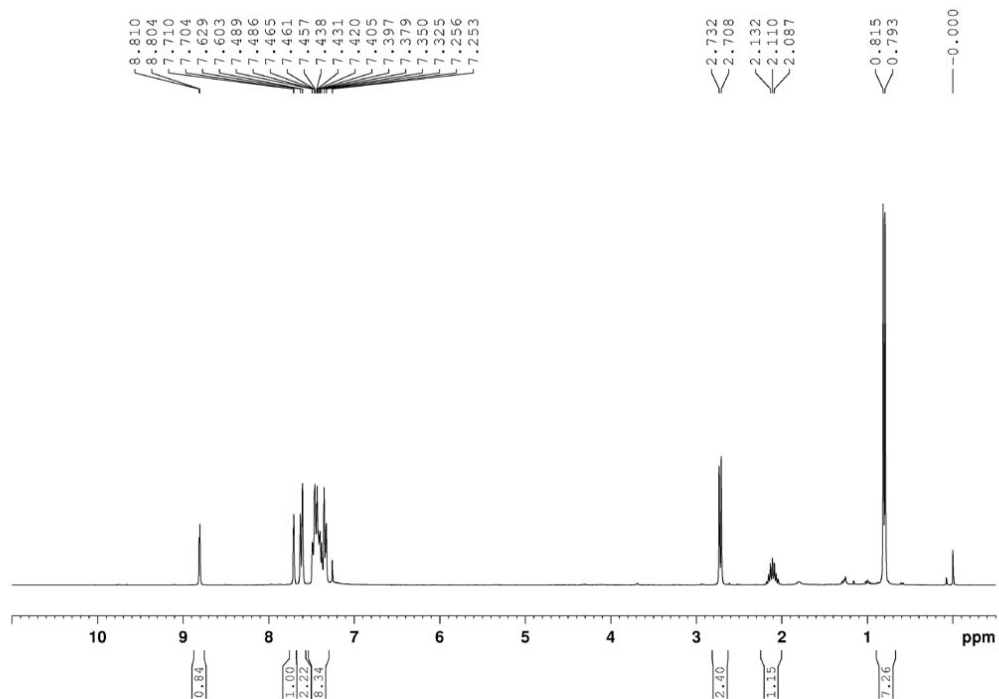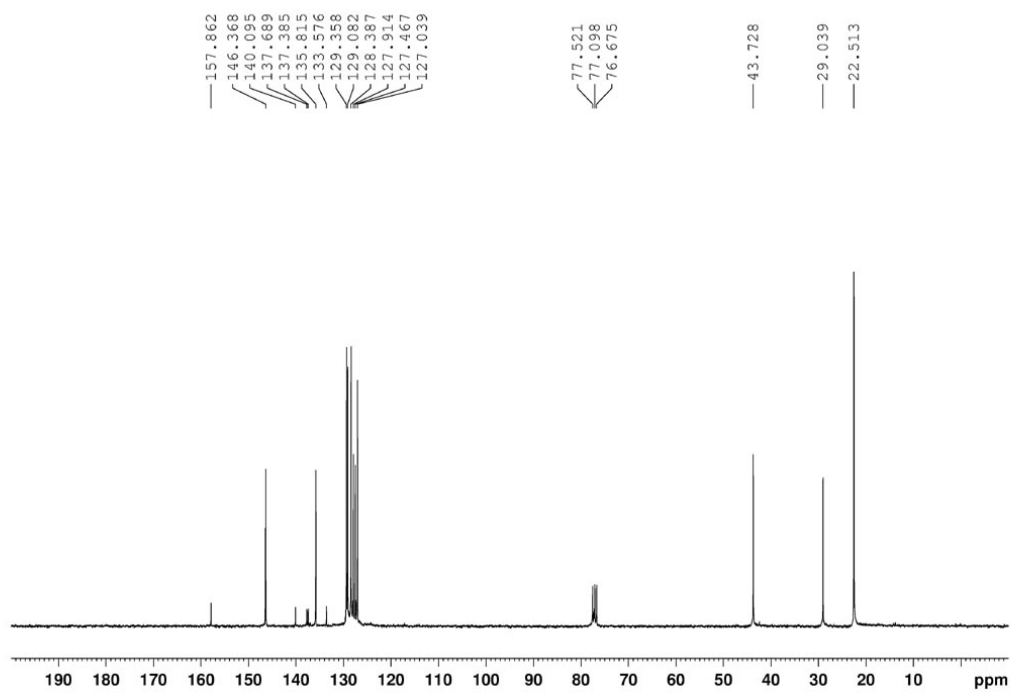

2-butyl-3,5-diphenylpyridine(C8)

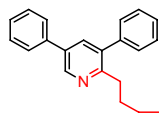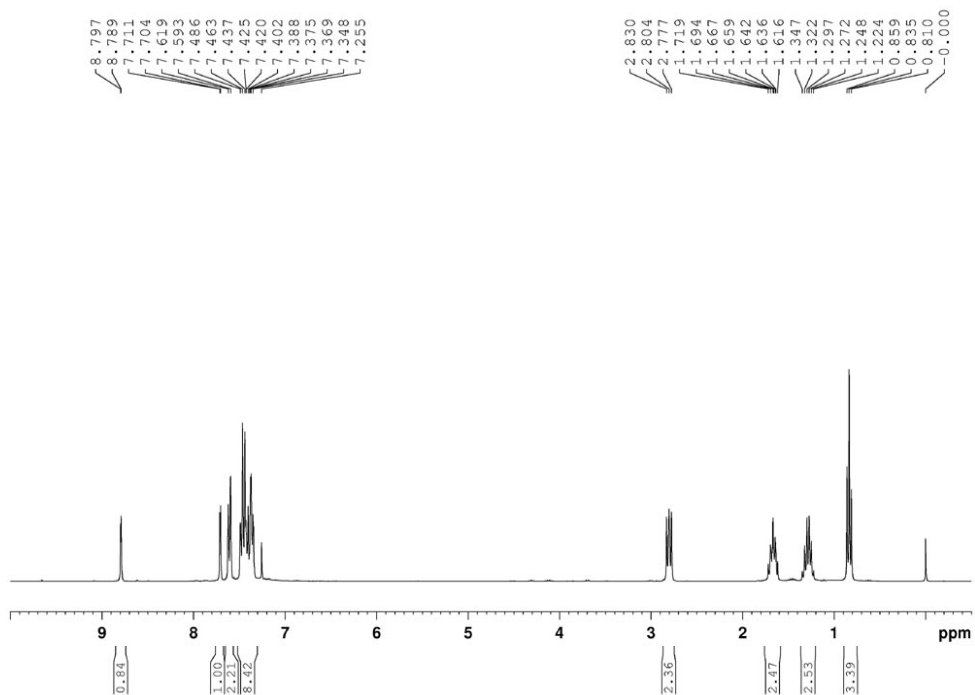



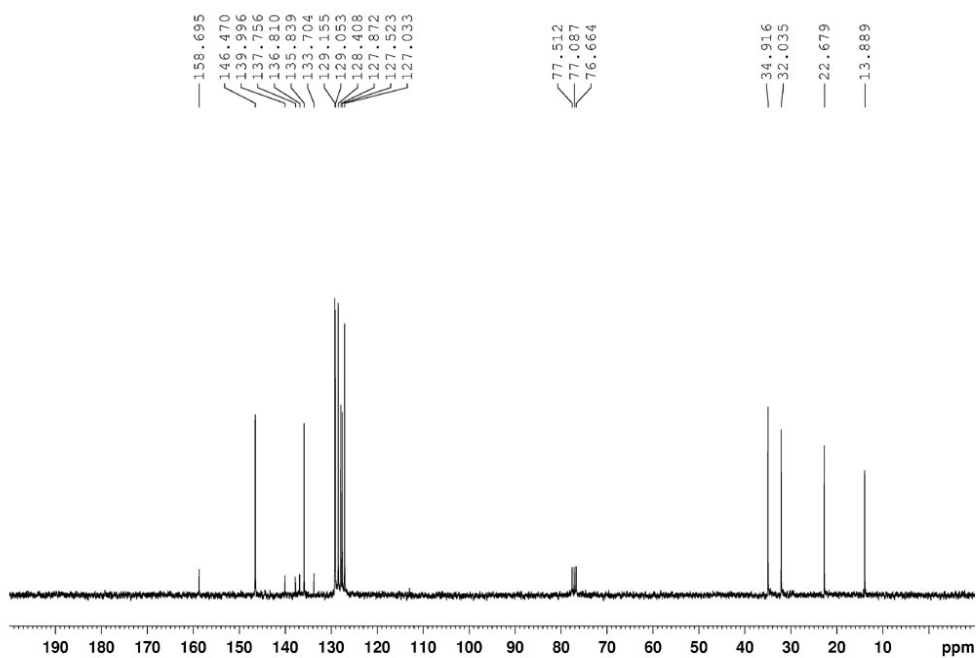

**2-benzyl-3,5-diphenylpyridine(C9)**

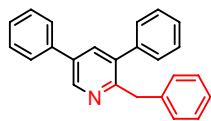

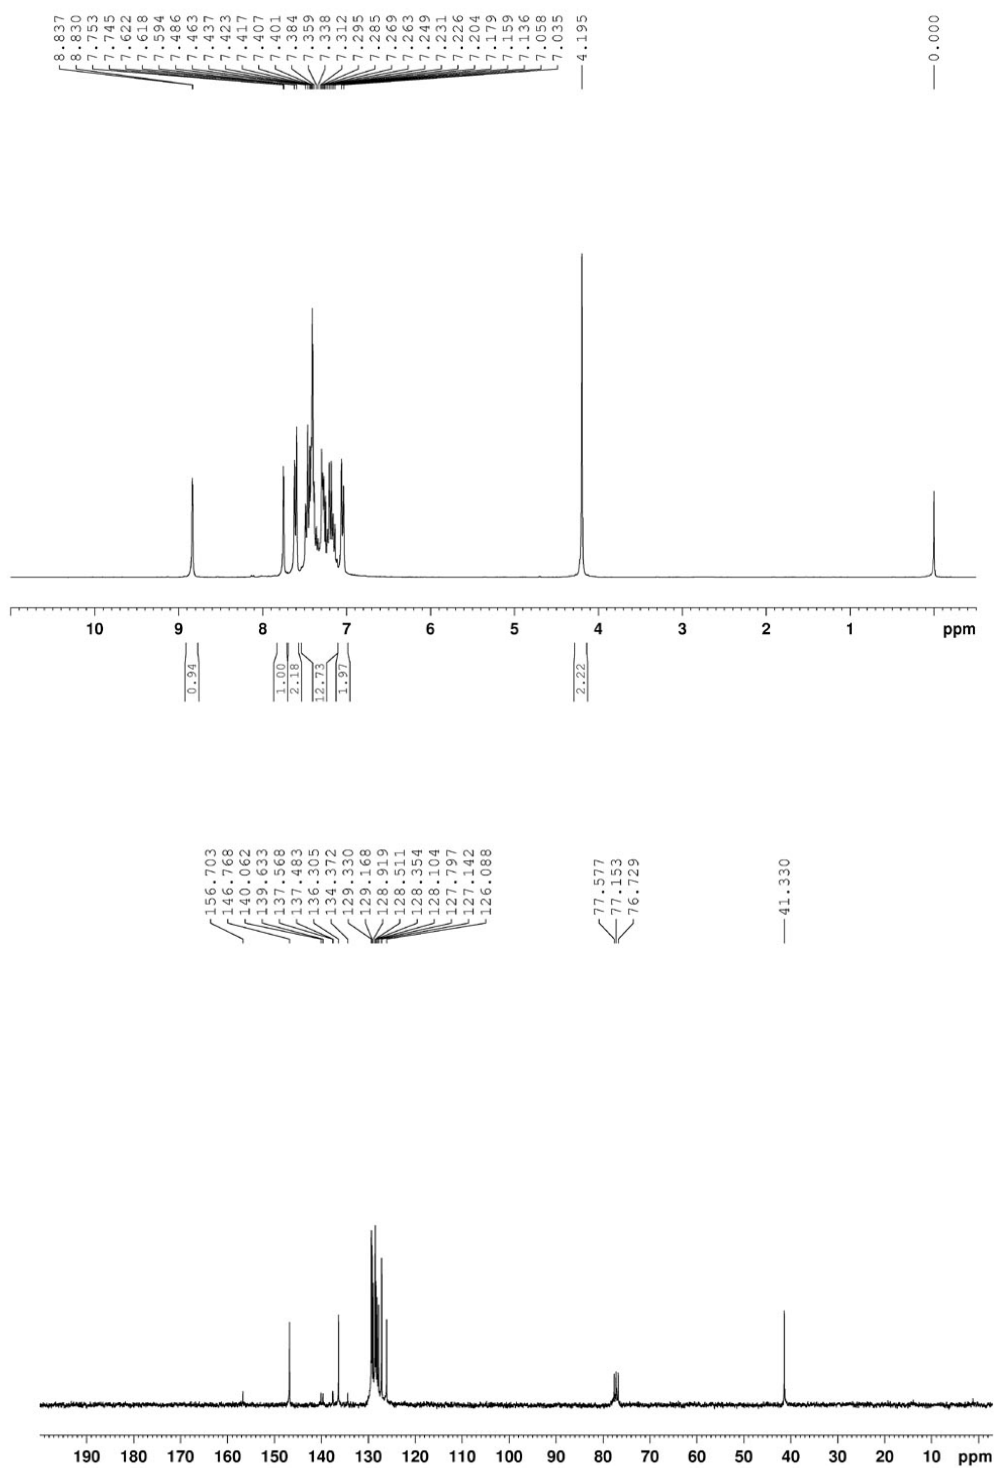

methyl 3-(3,5-diphenylpyridin-2-yl)propanoate (C10)

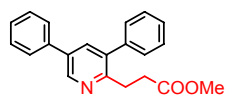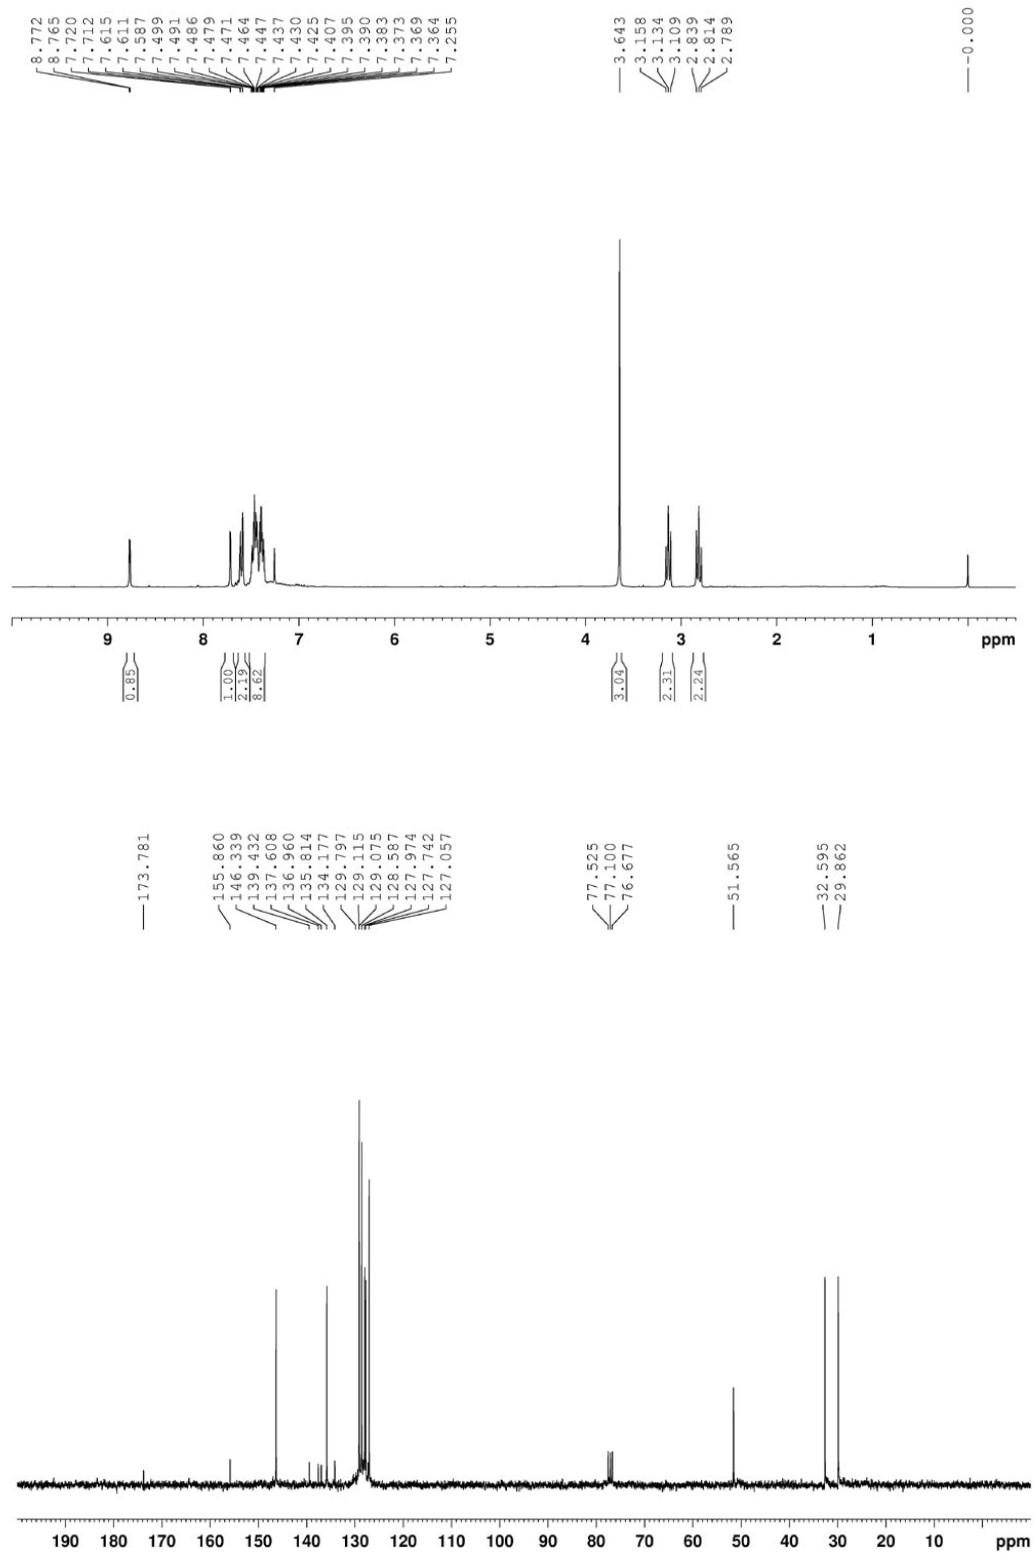

### 2-phenyl-3,5-dip-tolylpyridine (C11)

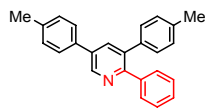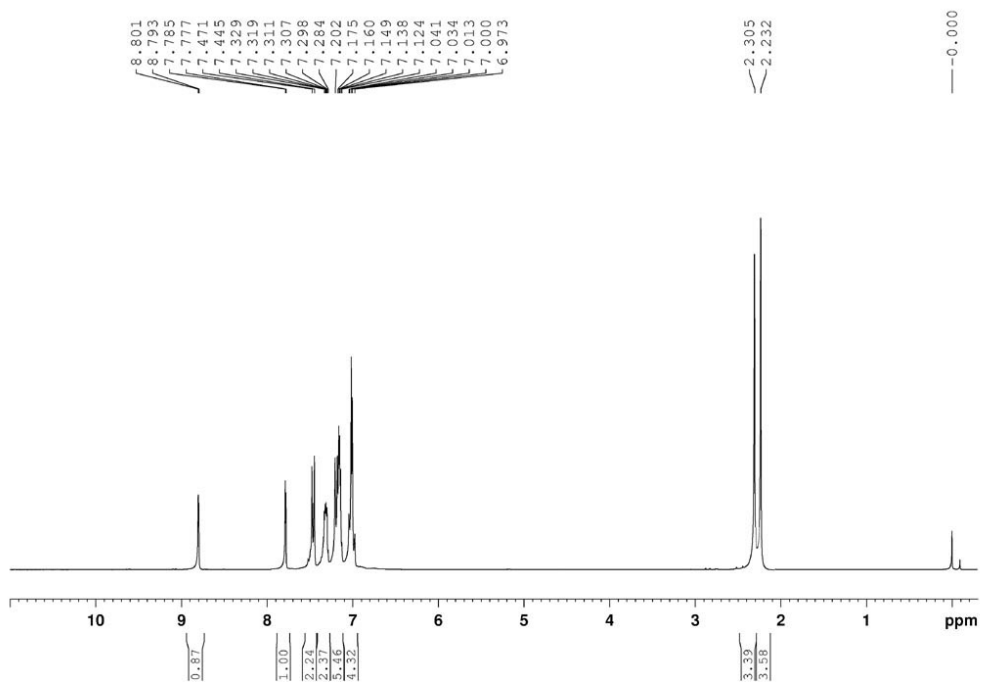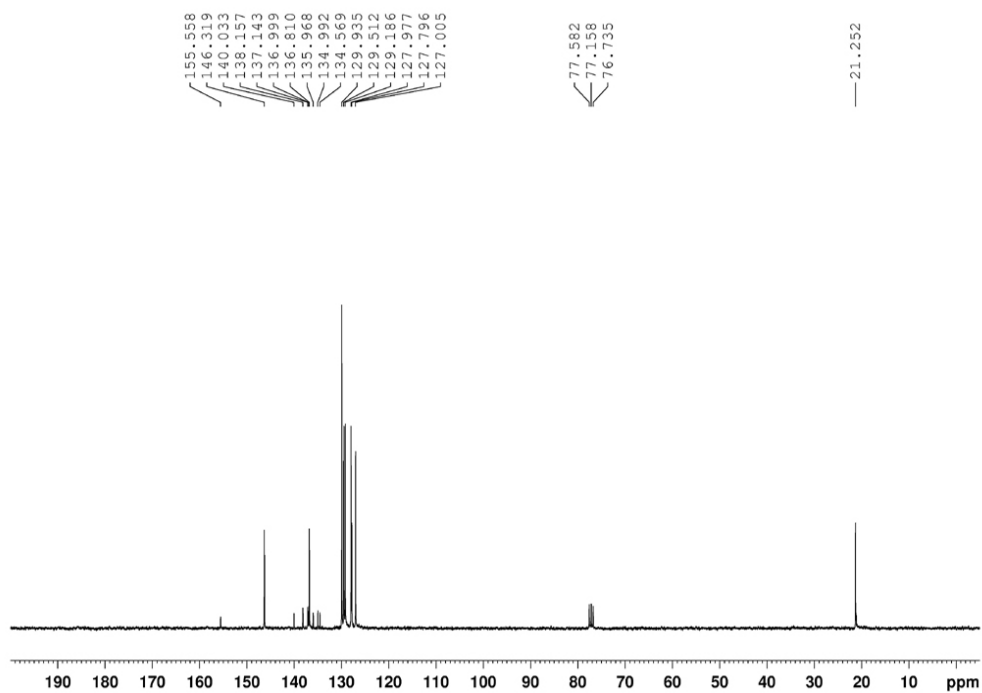

**3,5-bis(4-chlorophenyl)-2-phenylpyridine(C12)**

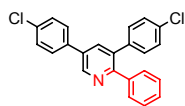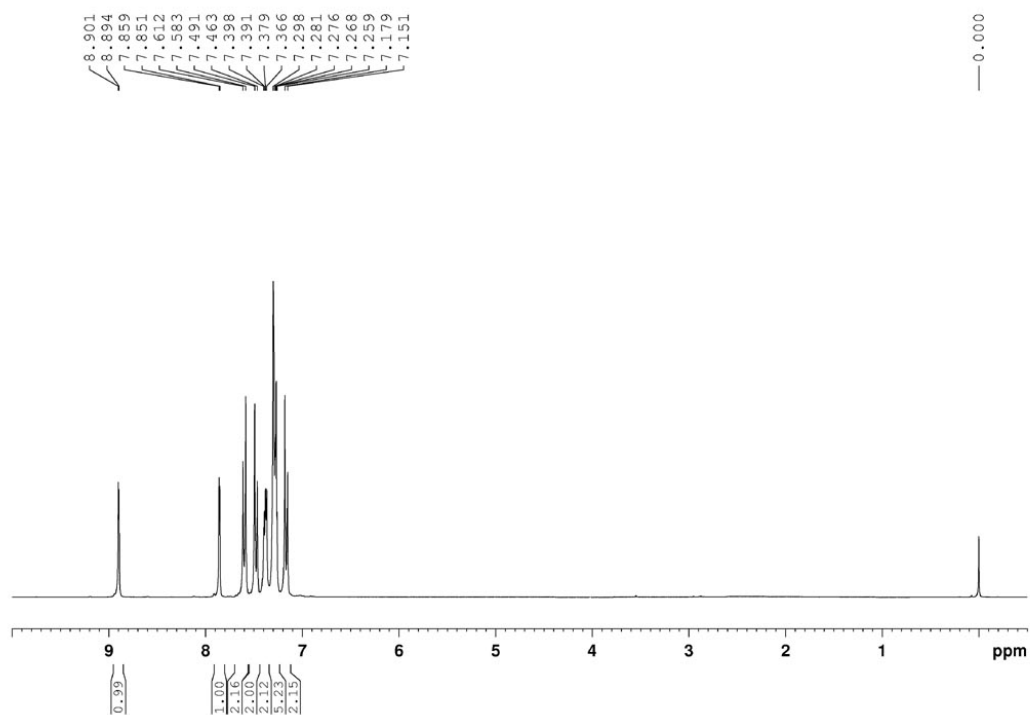

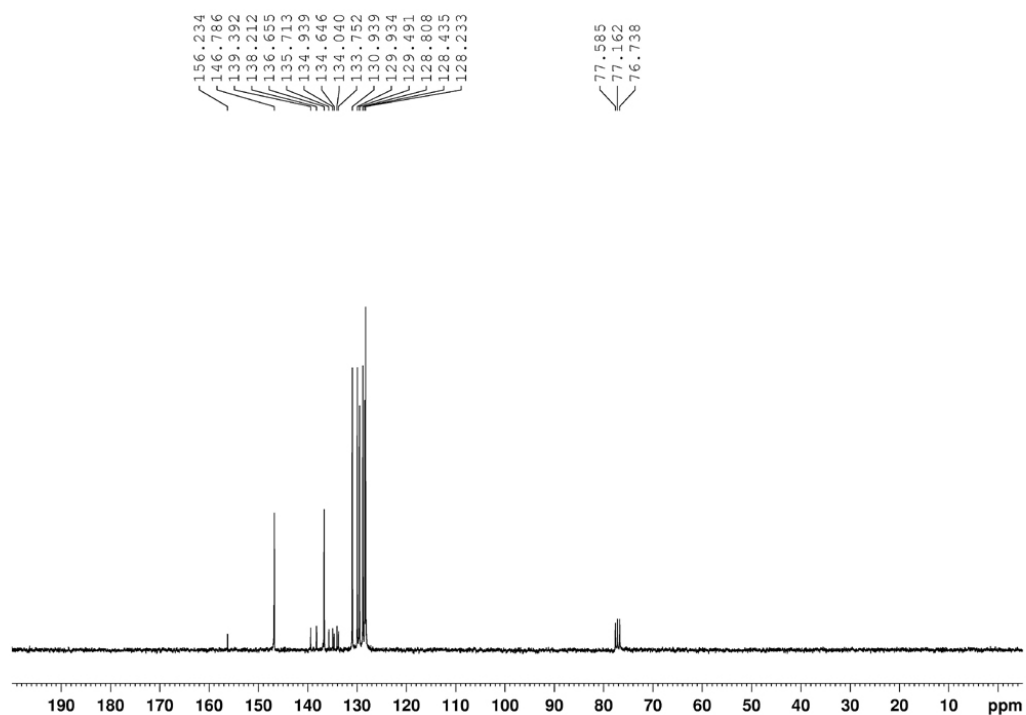

**2-phenyl-3,5-di(thiophen-3-yl)pyridine(C13)**

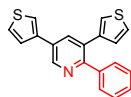

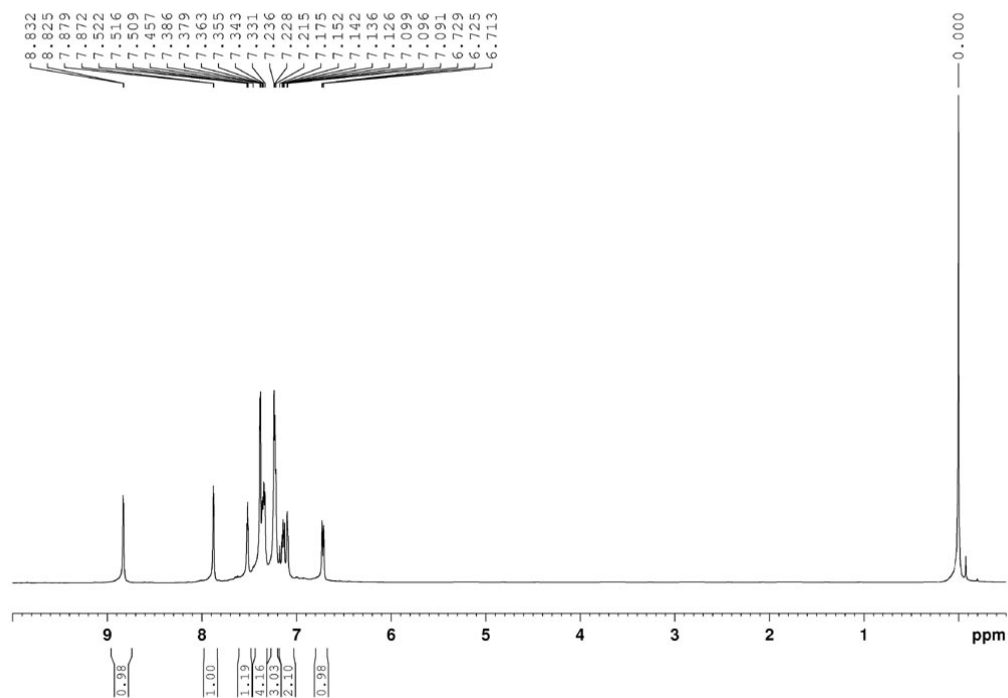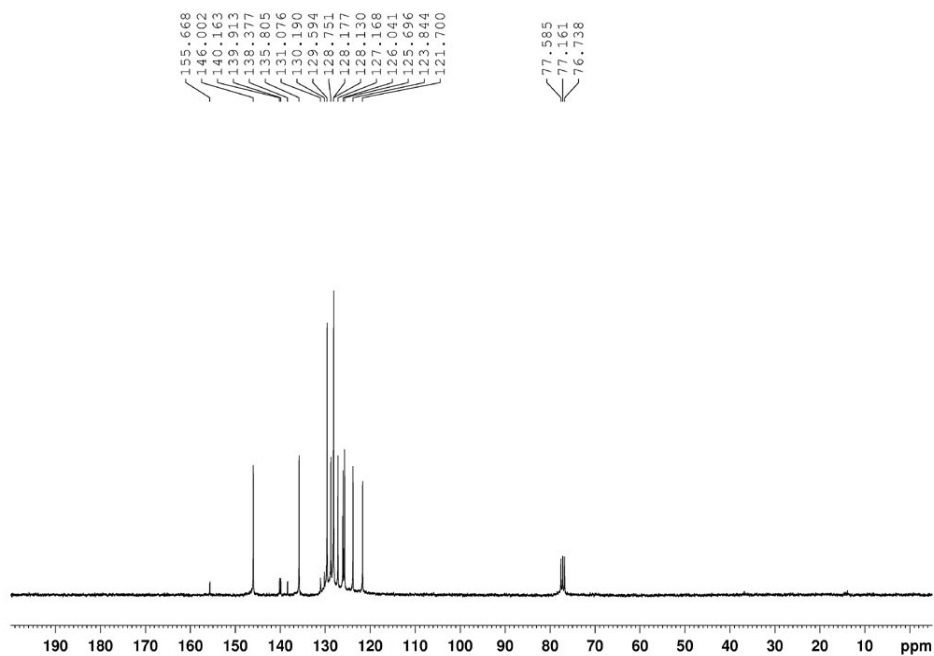

Supplement: c0gc00753f.pdf [file c0gc00753f.pdf]
